# Supplementary material for: Attitudes Towards Cardiopulmonary Resuscitation Situations and the Associations of Possible Affecting Factors – a Survey Among 3,602 in-hospital Healthcare Professionals
Source: Research Square preprint supplement (doi:10.21203/rs.3.rs-139433/v1), 2021-01-08
Supplement: Supplementary file 1 [file 92e0a1fac5588c7e9b5c7a86.docx]

Additional file 1, flowchart of participants.

n=6,055 invited participants

n=967 participants with previous CPR experience

n=1,187 participants with no previous CPR experience

n=1,448 participants

(Region 2, 2015-2016)

n=2,154 participants

(Region 1, 2008)

n=3,602 responding participants
